# Supplementary material for: Combined Effects of Ocean Acidification and Light or Nitrogen Availabilities on 13C Fractionation in Marine Dinoflagellates
Source: PLoS One. 2016 May 6;11(5):e0154370. doi: 10.1371/journal.pone.0154370 (PMC4859495; doi:10.1371/journal.pone.0154370)
Supplement: S1 Appendix — Average dissolved CO2 concentrations (μmol L-1), total alkalinity (TA: μmol L-1), dissolved inorganic carbon (DIC; μmol L-1) and pH (NBS scale). Values represent the mean (±SD) of triplicate incubations (n = 3), except for LN experiments which represent the mean of duplicate incubations (n = 2 ±SD). Superscript letters indicate significant differences between pCO2 treatments (ANOVA; P<0.05, only applied when n>2). (DOCX) [file pone.0154370.s001.docx]

**Appendix 1.** Overview of the carbonate chemistry in all treatments. Average dissolved CO2 concentrations (μmol L-1), total alkalinity (TA: μmol L-1), dissolved inorganic carbon (DIC; μmol L-1) and pH (NBS scale). Values represent the mean (±SD) of triplicate incubations (n=3), except for LN experiments which represent the mean of duplicate incubations (n=2 ±SD). Superscript letters indicate significant differences between *p*CO2 treatments (ANOVA; P<0.05, only applied when n>2).

| *p*CO2  μatm | CO2  μmol L-1 | TA  μmol L-1 | DIC  μmol L-1 | pH  NBS |  | *p*CO2  μatm | CO2  μmol L-1 | TA  μmol L-1 | DIC  μmol L-1 | pH  NBS |
| --- | --- | --- | --- | --- | --- | --- | --- | --- | --- | --- |
| *G. spinifera <LL>* | | | | |  | *A. tamarense <LN>* | | | | |
| 380 | 16.7±0.9 | 2413±32 | 2427±5a | 8.14±0.02a |  | 220 | 8.4±0.4[18] | 2372±11[18] | 2099±8a,[18] | 8.39±0.2a,[18] |
| 800 | 28.1±3.0 | 2412±26 | 2399±17b | 7.95±0.04b |  | 800 | 30.1±3.4[18] | 2398±21[18] | 2253±13b,[18] | 7.92±0.05b,[18] |
| 1200 | 37.1±3.9 | 2407±1 | 2412±25b | 7.84±0.04c |  | 1000 | 37.9±2.1[18] | 2397±7[18] | 2274±13b,[18] | 7.82±0.02c,[18] |
| *G. spinifera <HL>* | | | | |  | *A. tamarense <HN>* | | | | |
| 180 | 6.4±1.0[16] | 2447±5[16] | 1962±15a,[16] | 8.50±0.05a,[16] |  | 180 | 6.1±0.9[15;16] | 2434±3[15;16] | 1992±33a,[15;16] | 8.50±0.06a,[15;16] |
| 380 | 12.4±2.2[16] | 2461±12[16] | 2083±1b,[16] | 8.27±0.07b,[16] |  | 380 | 11.8±2.1[15;16] | 2439±1[15;16] | 2117±41b,[15;16] | 8.27±0.07b,[15;16] |
| 800 | 29.3±6.7[16] | 2475±13[16] | 2224±9c,[16] | 7.96±0.10c,[16] |  | 800 | 26.5±5.8[15;16] | 2434±2[15;16] | 2245±37c,[15;16] | 7.97±0.10c,[15;16] |
| 1200 | 44.7±6.4[16] | 2459±4[16] | 2293±5d,[16] | 7.78±0.06d,[16] |  | 1200 | 37.3±9.3[15;16] | 2418±1[15;16] | 2283±34d,[15;16] | 7.83±0.12d,[15;16] |
| *P. reticulatum <LL>* | | | | |  | *S. trochoidea <LN>* | | | | |
| 380 | 14.8±1.9 | 2448±10 | 2160±4a | 8.20±0.05a |  | 280 | 11.2±0.4[18] | 2349±6[18] | 2148±0a,[18] | 8.30±0.01a,[18] |
| 800 | 38.4±5.7 | 2456±16 | 2307±6b | 7.84±0.06b |  | 590 | 22.6±0.7[18] | 2389±5[18] | 2229±2b,[18] | 8.03±0.01b,[18] |
| 1200 | 51.3±8.7 | 2471±20 | 2330±2c | 7.73±0.07b |  | 770 | 29.8±1.5[18] | 2365±1[18] | 2251±8c,[18] | 7.92±0.02c,[18] |
| *P. reticulatum <HL>* | | | | |  | *S. trochoidea <HN>* | | | | |
| 180 | 7.6±0.5[16] | 2460±8[16] | 2002±2a,[16] | 8.43±0.04a,[16] |  | 180 | 6.8±0.2[15;16] | 2386±1[15;16] | 1872±16a,[15;16] | 8.45±0.01a,[15;16] |
| 380 | 14.8±0.8[16] | 2455±2[16] | 2121±4b,[16] | 8.21±0.02b,[16] |  | 380 | 13.4±0.5[15;16] | 2388±2[15;16] | 2096±10b,[15;16] | 8.21±0.02b,[15;16] |
| 800 | 28.5±2.7[16] | 2461±12[16] | 2249±23c,[16] | 7.88±0.08c,[16] |  | 800 | 29.5±2.1[15;16] | 2385±1[15;16] | 2223±11c,[15;16] | 7.91±0.03c,[15;16] |
| 1200 | 43.0±3.4[16] | 2473±19 | 2288±16d,[16] | 7.75±0.05d,[16] |  | 1200 | 42.5±3.6[15;16] | 2386±4[15;16] | 2268±18d,[15;16] | 7.77±0.04d,[15;16] |
